# Supplementary material for: In situ synthesis of copper nanoparticles encapsulated by nitrogen-doped graphene at room temperature via solution plasma
Source: PubMed Central journal article supplement — RSC Adv. 2020 Oct 6;10(60):36627–35. doi: 10.1039/d0ra07162e (PMC9057025; doi:10.1039/d0ra07162e), 2020-10-06
Supplement: RA-010-D0RA07162E-s001.pdf [file RA-010-D0RA07162E-s001.pdf]

Electronic Supplementary Material (ESI) for RSC Advances.  
This journal is © The Royal Society of Chemistry 2020

Supporting Information

## **In situ synthesis of copper nanoparticles encapsulated by nitrogen-doped graphene at room temperature via solution plasma**

Phu Quoc Phan,<sup>a</sup> Sangwoo Chae,<sup>ac</sup> Phuwadej Pornaroontham,<sup>ac</sup> Yukihiro Muta,<sup>ac</sup> Kyusung Kim,<sup>e</sup>

Xiaoyang Wang<sup>ad</sup> and Nagahiro Saito<sup>\*abcd</sup>

<sup>a</sup>Department of Chemical Systems Engineering, Graduate School of Engineering, Nagoya University,  
Furo-cho, Chikusa-ku, Nagoya 464-8603, Japan

<sup>b</sup>Conjoint Research Laboratory in Nagoya University, Shinshu University, Furo-cho, Chikusa-ku,  
Nagoya 464-8603, Japan

<sup>c</sup>Japan Science and Technology Corporation (JST), Open Innovation Platform with Enterprises,  
Research Institute and Academia (OPERA), Furo-cho, Chikusa-ku, Nagoya 464-8603, Japan

<sup>d</sup>Japan Science and Technology Corporation (JST), Strategic International Collaborative Research  
Program (SICORP), Furo-cho, Chikusa-ku, Nagoya 464-8603, Japan

<sup>e</sup>National Institute of Advanced Industrial Science and Technology (AIST), Anagahora,  
Shimoshidami, Moriyama, Nagoya 463-8560, Japan

\*Corresponding author e-mail: hiro@sp.material.nagoya-u.ac.jp

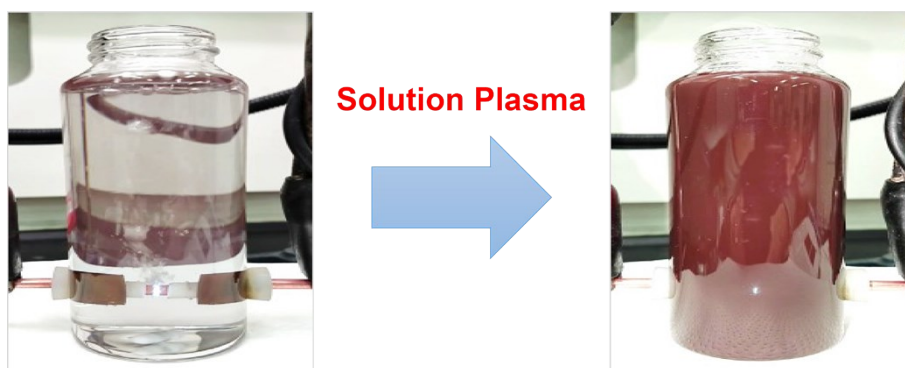

**Fig. S1** Solution plasma (SP) synthesis of Cu-NFG.

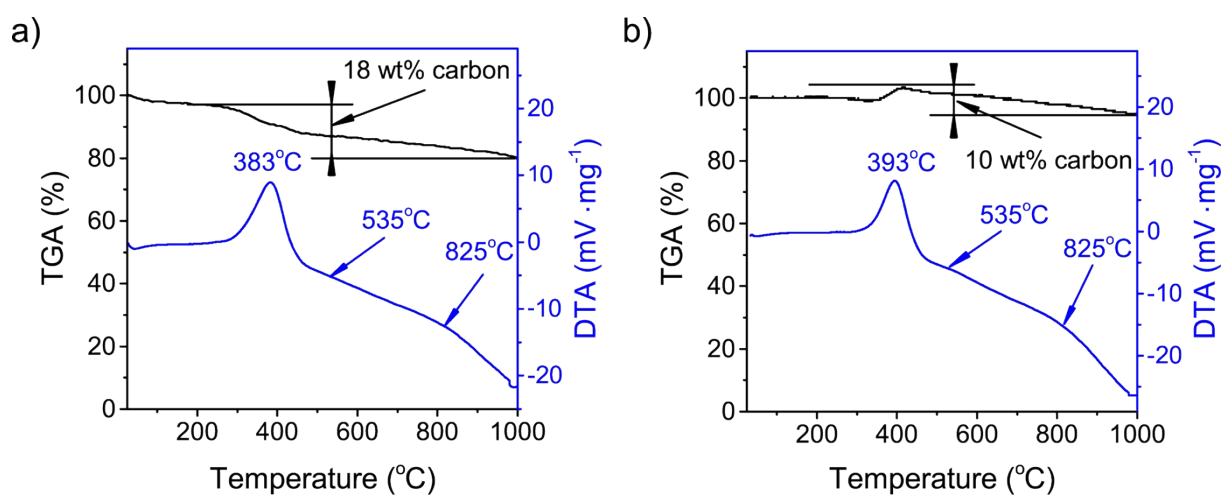

**Fig. S2** TGA and DTA results of Cu-NFG-100 (a) and Cu-NFG-200 (b).

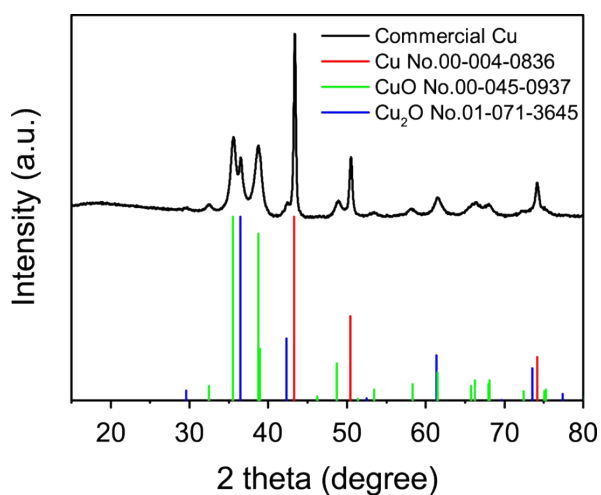

**Fig. S3** XRD of commercial Cu and JCPDS of Cu, CuO and Cu<sub>2</sub>O.

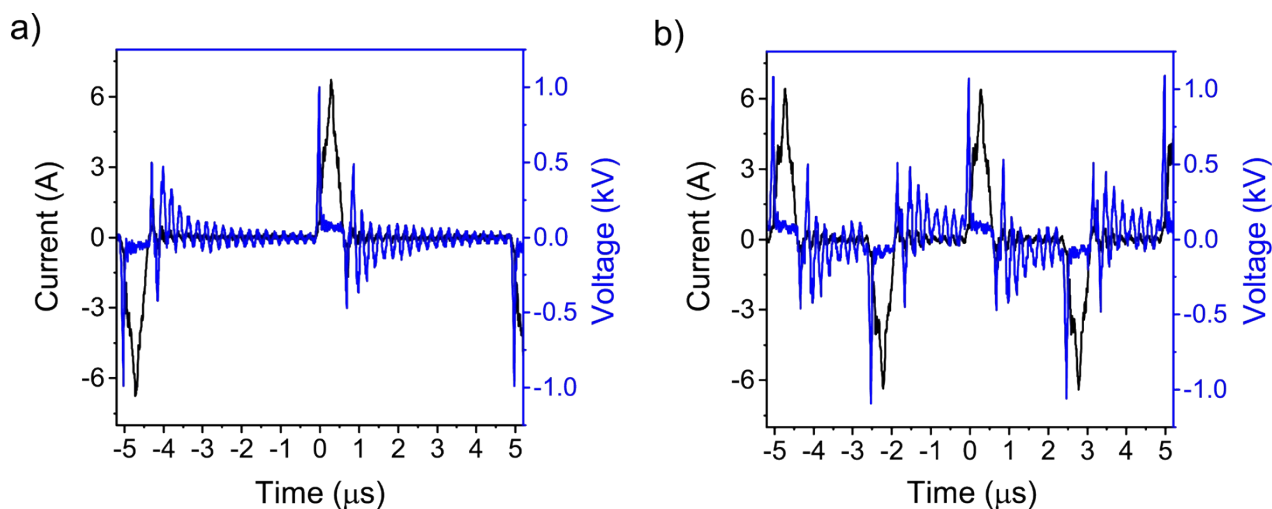

**Fig. S4** Current and voltage waveforms during discharge in DMF at 100 kHz (a) and 200 kHz (b).

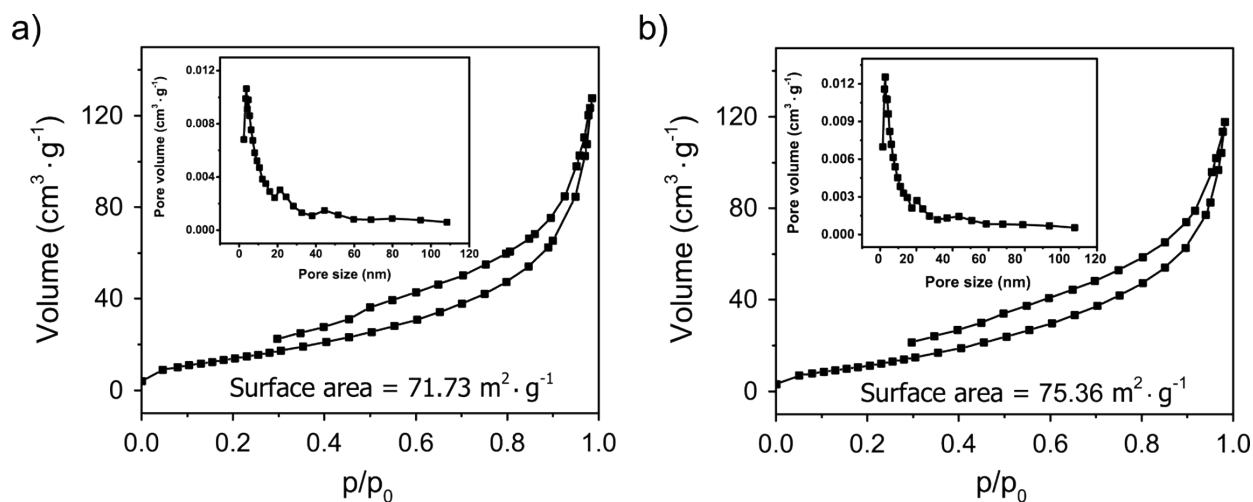

**Fig. S5** Nitrogen adsorption-desorption isotherm at  $-196 \text{ }^\circ\text{C}$ , Brunauer-Emmett-Teller (BET) surface area and pore volume distribution results of Cu-NFG-100 (a), and Cu-NFG-200 (b).

### Calculation of the electron excitation temperature

The electron excitation temperature is calculated using the equation:

$$T_e = -\frac{E_k - E_i}{k} \left[ \ln \left( \frac{A_k g_k I_i \lambda_i}{A_i g_i I_k \lambda_k} \right) \right]^{-1}$$

where:

- $E$  is the energy of the upper level (eV),
- $k$  is the Boltzmann constant ( $8.617 \times 10^{-5} \text{ eV}\cdot\text{K}^{-1}$ ),
- $A$  is the transition probability ( $\text{s}^{-1}$ ),
- $g$  is statistical weight,
- $I$  is spectral intensity (a.u.),
- $\lambda$  is the emission spectrum wavelength (nm).

In this calculation, spectral lines of  $H_\alpha$  and  $H_\beta$  were selected to calculate the electron temperature with the detail as table below:

Spectroscopic data of Hydrogen peak present in the solution plasma:

| Spectrum                                              | $H_\alpha$ | $H_\beta$ |
|-------------------------------------------------------|------------|-----------|
| Emission spectrum wavelength, $\lambda$ (nm)          | 659.32     | 489.20    |
| Spectral intensity, $I$ at 100kHz (a.u.)              | 7215.32    | 2316.38   |
| Spectral intensity, $I$ at 200kHz (a.u.)              | 22310.22   | 6812.40   |
| Statistical weight, $g$                               | 16         | 32        |
| Upper level energy, $E$ (eV)                          | 12.41      | 12.75     |
| Transition probability, $A$ ( $10^6 \text{ s}^{-1}$ ) | 44.1       | 1.7       |
